# Supplementary material for: Adult Multipotent Cardiac Progenitor-Derived Spheroids: A Reproducible Model of In Vitro Cardiomyocyte Commitment and Specification
Source: MDPI journal article supplement (doi:10.3390/cells12131793), 2023-07-05
Supplement: s1 [file s1]

*Article*

# **Differentiation of Cardiac stem cells derived spheroids: a reproducible model of in vitro cardiomyocyte commitment and specification**

Mariangela Scalise, Fabiola Marino, Luca Salerno, Nunzia Amato, Claudia Quercia, Chiara Siracusa, Loredana Pagano, Andrea Filardo, Antonio Chiefalo, Giuseppe Misdea, Nadia Salerno, Antonella De Angelis, Konrad Urbanek, Daniele Torella, Eleonora Cianflone

*Supplementary Material*

**A**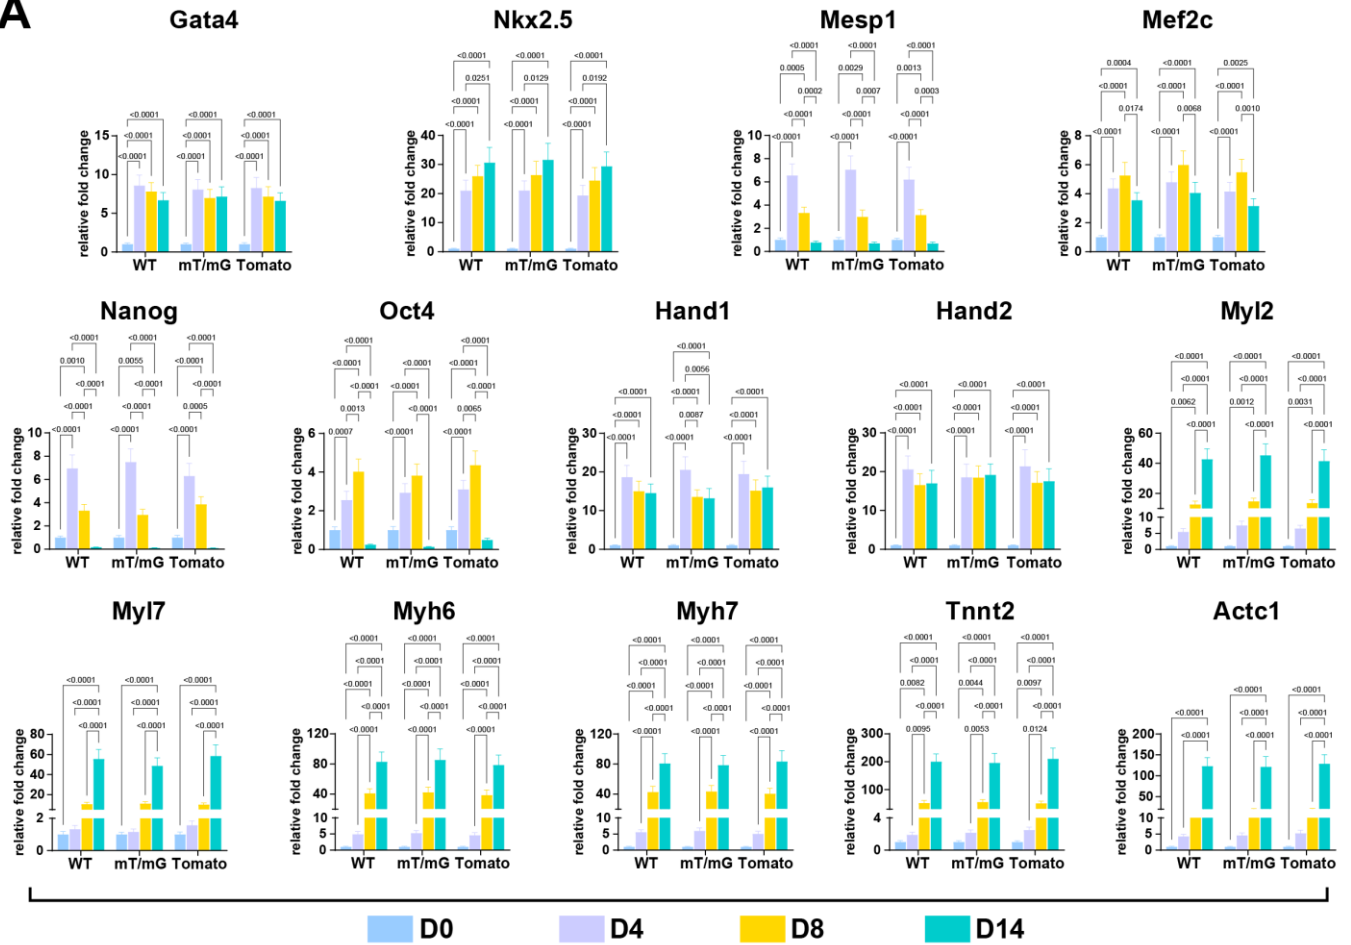

**Supplementary Figure S1. Cardiac transcription factors and pluripotency genes expression in response to 2D to 3D culture switch. (A)** Bar graphs showing the cumulative qRT-PCR of cardiac transcription factors and contractile genes in differentiating WT-CSC, mT/mG-CSC and Tomato-CSC at D0, D4, D8 and D14 of the myogenic commitment (n=3 for each clone). Data are expressed as mean  $\pm$  S.D.

Supplementary Table S1

## WT-CSCs

| Marker         | D0        | D4        | D8        | D14       |
|----------------|-----------|-----------|-----------|-----------|
| Sca-1          | 99,5±1%   | 56±2,4%   | 38,5±2,5% | 99±0,5%   |
| CD45           | 0,6±0,1%  | 0%        | 0%        | 0%        |
| CD31           | 1,3±0,2%  | 0,5±0,1%  | 0,8±0,1%  | 1,1±0,2%  |
| CD140 $\alpha$ | 98±2%     | 0,4±0,1%  | 2,5±0,3%  | 0,5±0,1%  |
| CD34           | 3,8±0,1%  | 2,7±0,3%  | 0,1±0,1%  | 2,4±0,3%  |
| CD44           | 95,6±3%   | 97,3±2,5% | 85,6±5,5% | 95,7±3%   |
| CD63           | 98,6±2%   | 2,5±0,3%  | 36,9±1,5% | 21,8±2,2% |
| CD90           | 0,1±0,1%  | 1,7±0,2%  | 0%        | 0%        |
| CD105          | 99,6±2,5% | 66,7±2,2% | 10±0,9%   | 3±0,2%    |
| CD13           | 2,7±0,3%  | 4,5±0,4%  | 2,1±0,3%  | 0,5±0,2%  |
| CD166          | 84,6±4%   | 86±5%     | 99±1%     | 84±4%     |
| CD309          | 3,3±0,3%  | 1,6±0,3%  | 3,4±1,3%  | 0,7±0,1%  |
| ROR2           | 2,9±0,3%  | 1,8±0,2%  | 1,5±0,1%  | 0,9±0,1%  |
| CD140 $\beta$  | 44,9±4,6% | 0%        | 0%        | 0%        |

## mT/mG-CSCs

| Marker         | D0       | D4       | D8       | D14      |
|----------------|----------|----------|----------|----------|
| Sca-1          | 99±1%    | 55±2%    | 36±3%    | 99±0,1%  |
| CD45           | 0,7±0,1% | 0%       | 0%       | 0%       |
| CD31           | 1±0,1%   | 0,3±0,1% | 0,2±0,1% | 1±0,1%   |
| CD140 $\alpha$ | 96±2%    | 0,5±0,1% | 2,5±0,3% | 0%       |
| CD34           | 4±0,1%   | 3±0,2%   | 0,1±0,1% | 3±0,5%   |
| CD44           | 93±1%    | 96±2%    | 80±5%    | 93±2%    |
| CD63           | 97±2%    | 2,5±0,3% | 33±1%    | 25±2%    |
| CD90           | 0,1±0,1% | 2±0,1%   | 0%       | 0%       |
| CD105          | 95±1%    | 65±2%    | 11±1%    | 15±0,2%  |
| CD13           | 3±0,2%   | 5±0,5%   | 2,3±0,5% | 0,3±0,1% |
| CD166          | 96±1%    | 80±4%    | 96±2%    | 84±3%    |
| CD309          | 4±0,5%   | 2±0,4%   | 2,8±2%   | 0,5±0,1% |
| ROR2           | 3,4±0,2% | 2±0,2%   | 1,7±0,1% | 1±0,1%   |
| CD140 $\beta$  | 40±4%    | 0%       | 0%       | 0%       |

## Tomato-CSCs

| Marker         | D0       | D4       | D8       | D14      |
|----------------|----------|----------|----------|----------|
| Sca-1          | 96±2%    | 50±2%    | 34±3     | 96±1     |
| CD45           | 0,6±0,1% | 0%       | 0%       | 0%       |
| CD31           | 1,5±0,2% | 0,5±0,1% | 0,1±0,1% | 2±0,2%   |
| CD140 $\alpha$ | 95±2%    | 1±0,1%   | 0,8±0,2% | 0%       |
| CD34           | 3±0,1%   | 2,5±0,1% | 0,1±0,1% | 3±0,4%   |
| CD44           | 92±0,5%  | 97±2,3%  | 82±4%    | 94±3%    |
| CD63           | 93±2%    | 3±0,3%   | 30±3%    | 23±1%    |
| CD90           | 0,3±0,1% | 1,5±0,2% | 0%       | %        |
| CD105          | 96±2%    | 60±3%    | 9±1%     | 2±0,2%   |
| CD13           | 3,2±0,1% | 4,5±0,5% | 2,5±0,5% | 0,4±0,1% |
| CD166          | 94±1%    | 78±2%    | 94±2%    | 82±3%    |

|         |          |          |        |          |
|---------|----------|----------|--------|----------|
| CD309   | 4,5±0,1% | 2,2±0,4% | 3±1%   | 0,9±0,1% |
| ROR2    | 3,0±0,1% | 2,5±0,4% | 2±0,2% | 1,3±0,2% |
| CD140 β | 42±3%    | 0%       | 0%     | 0%       |
